# Supplementary material
Source: Springer Nature journal article supplement (https://www.springermedizin.de/resource/supplementary/13058_2004_946_MOESM10_ESM.pdf/9705688)

Peak of  $\text{CH}_2/\text{CH}_3$  ratio  
(relative folds over control)

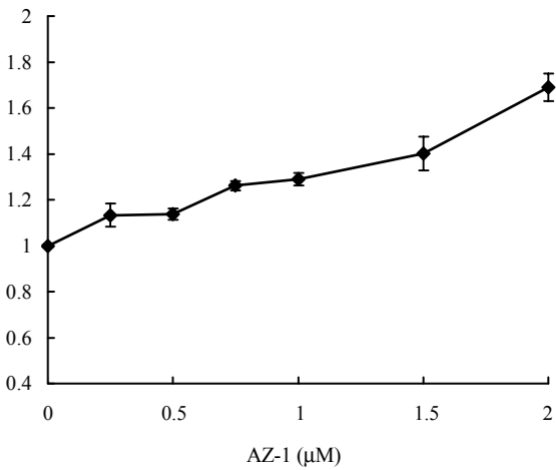

Supplement: MOESM10 [file 9705688]
